# Supplementary material for: Regulation of NF-κB by PML and PML-RARα
Source: PubMed Central journal article supplement (PMC5357907; doi:10.1038/srep44539), 2017-03-20
Supplement: srep44539-s1.pdf [file srep44539-s1.pdf]

## **Regulation of NF- $\kappa$ B by PML and PML-RAR $\alpha$**

Abrar Ahmed, Xiaochun Wan, Izaskun Mitxitorena, Andrew J. Lindsay, Pier Paolo Pandolfi,

Mary W. McCaffrey, Karen Keeshan, Youhai H. Chen, Ruaidhrí J. Carmody

## **Supplementary Information**

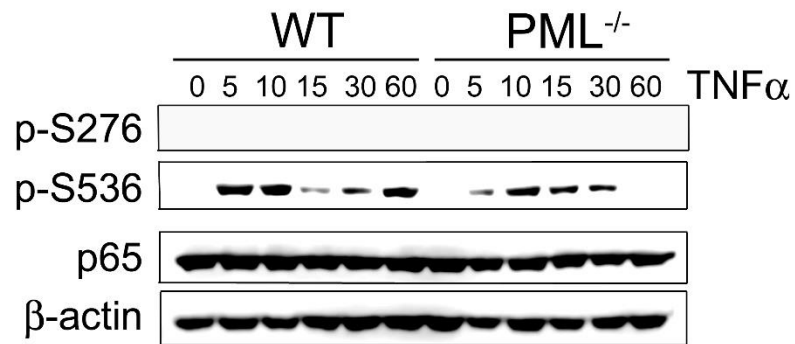

**Supplementary Figure S1:** WT and PML<sup>-/-</sup> MEFs were stimulated with TNF $\alpha$  (10ng/ml) for the indicated time (minutes) and analysed by immuno-blotting with antibodies for p65, phospho-S276 p65, phospho-S536 p65 and  $\beta$ -actin.

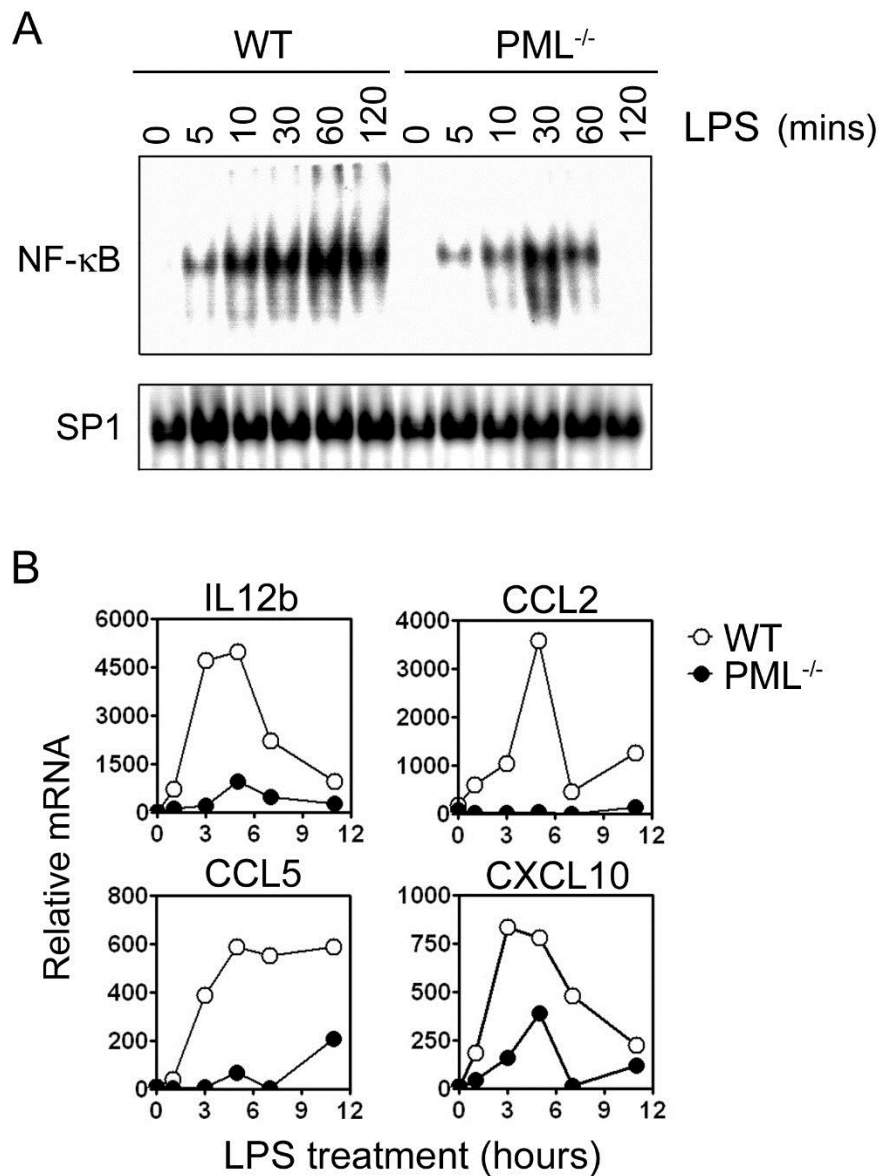

**Supplementary Figure S2:** (A) WT and PML<sup>-/-</sup> macrophages were stimulated with 100ng/ml LPS for the indicated times. Nuclear extracts were prepared and analysed by EMSA using oligonucleotides for the consensus NF-κB and Sp1 binding sites. (B) Real-time-PCR analysis of IL-12b, CCL2, CCL5 and CXCL10 mRNA from WT and PML<sup>-/-</sup> bone marrow derived macrophages treated with LPS for the indicated times.
